# Supplementary material for: Ipsilateral pubic ramus fracture during total hip arthroplasty is not rare: does it matter?
Source: Springer Nature journal article supplement (doi:10.1007/s00402-024-05368-5), 2024-05-14
Supplement: MOESM5 [file 27090422]

**Ipsilateral pubic ramus fracture during total hip arthroplasty is not rare: Does it matter?**

Young-Seung Ko<sup>1</sup> MD; Han Jin Lee<sup>2</sup> MD; Hong Seok Kim<sup>1</sup> MD, PhD; Jeong Joon Yoo<sup>1</sup> MD, PhD

**Electronic Supplementary Material**

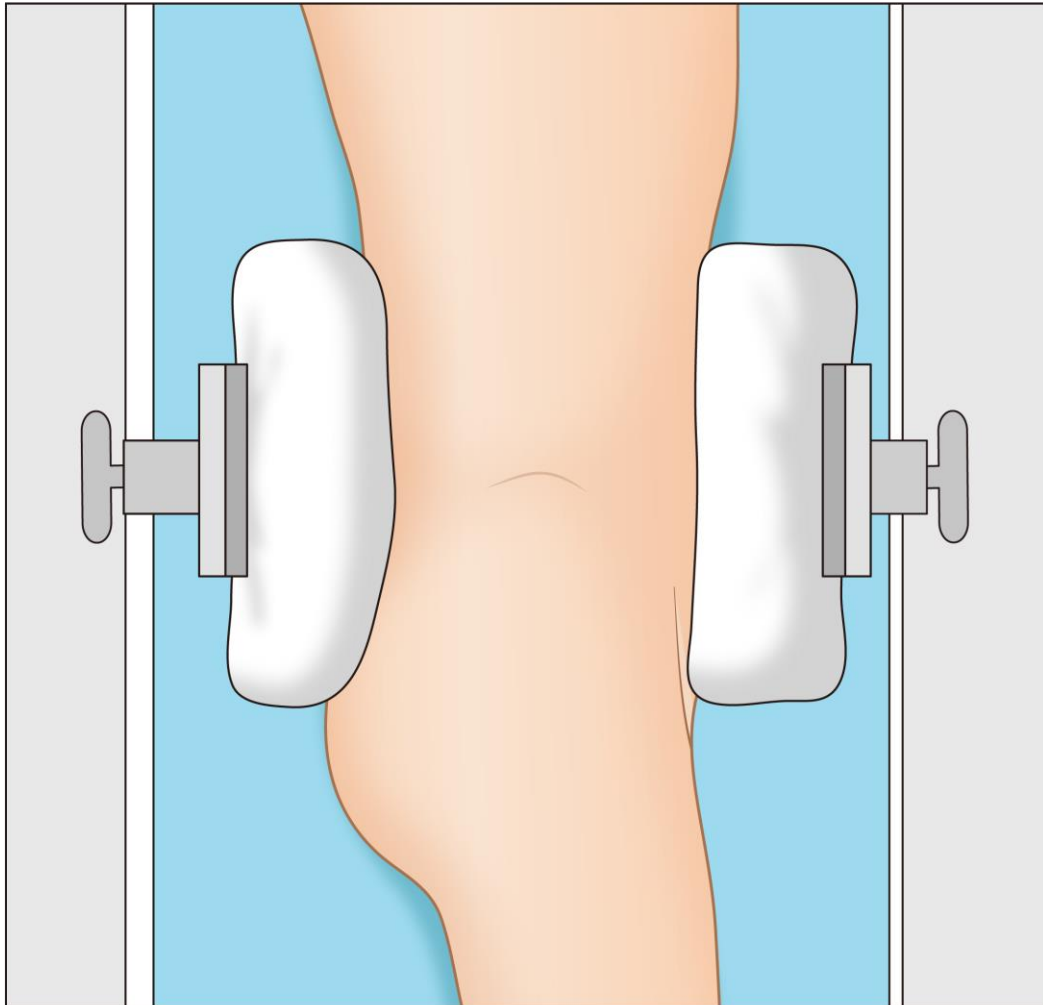

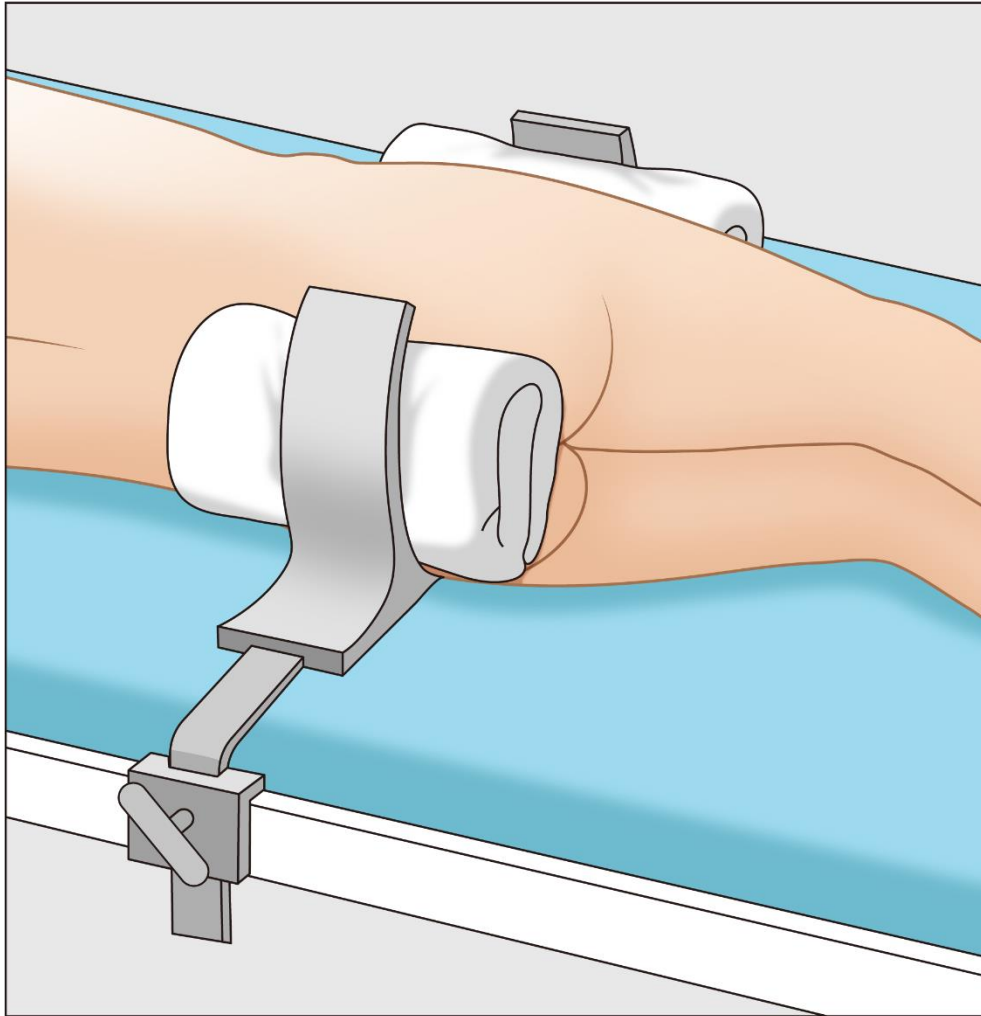

**Supplement Figure 1. The lateral hip positioner secured the pelvis of the patient in lateral decubitus position.**

**Correspondence to:** Jeong Joon Yoo, MD, PhD

Department of Orthopaedic Surgery, Seoul National University College of Medicine, Seoul, South Korea

101, Daehak-ro, Jongno-gu, Seoul, Republic of Korea

TEL: +82-2-2072-1994

FAX: +82-2-764-2718

E-mail: [jjyos@snu.ac.kr](mailto:jjyos@snu.ac.kr)
